# Detecting Inversions with PCA in the Presence of Population Structure

Ronald J. Nowling<sup>1</sup>, Krystal R. Manke<sup>1</sup>, and Scott J. Emrich<sup>2</sup>

<sup>1</sup>Milwaukee School of Engineering

<sup>2</sup>University of Tennessee – Knoxville

Corresponding author:

Ronald J. Nowling<sup>1</sup>

Email address: [nowling@msoe.edu](mailto:nowling@msoe.edu)

## ABSTRACT

Chromosomal inversions are associated with reproductive isolation and adaptation in insects such as *Drosophila melanogaster* and the malaria vectors *Anopheles gambiae* and *Anopheles coluzzii*. While methods based on read alignment have been useful in humans for detecting inversions, these methods are less successful in insects due to long repeated sequences at the breakpoints. Alternatively, inversions can be detected using principal component analysis (PCA) of single nucleotide polymorphisms (SNPs). We apply PCA-based inversion detection to a simulated data set and real data from multiple insect species, which vary in complexity from a single inversion in samples drawn from a single population to analyzing multiple overlapping inversions occurring in closely-related species, samples of which that were generated from multiple geographic locations. We show empirically that proper analysis of these data can be challenging when multiple inversions or populations are present, and that our alternative framework is more robust in these more difficult scenarios.

## INTRODUCTION

Chromosomal inversions play an important role in ecological adaptation by enabling the accumulation of beneficial alleles (Love et al. (2016); Fuller et al. (2018); Prevosti et al. (1988)) and reproductive isolation (Noor et al. (2001)). For example, the 2La inversion in the *Anopheles gambiae* complex has been associated with thermal tolerance of larvae (Rocca et al. (2009)), enhanced desiccation resistance in adult mosquitoes (Gray et al. (2009)), and susceptibility to at least one species (*Plasmodium falciparum*) of malaria (Riehle et al. (2017)).

Inversion analysis contains three sub-problems: detection (is an inversion present?), localization of an inversion along a chromosome arm, and determining the orientations of inversions present in each sample (karyotyping). Most techniques can perform a subset of these tasks, but not all of them. For example, some insects such as *Drosophila melanogaster* and the mosquito *Anopheles gambiae* have large polytene chromosomes, which can be seen directly under a microscope. This enables detection and karyotyping of previously characterized inversions (Lobo et al. (2010); Sharakhov et al. (2006); George et al. (2010)).

Computational approaches developed for model organisms such as human – or species without visible chromosomes including many other insects – are generally based on sequencing large DNA fragments from alternative karyotypes. Specifically, inversion breakpoints relative to a known reference genome can be discovered by checking for cases where either mate-pair or long-read sequence data align unexpectedly (e.g., Zhu et al. (2017); Corbett-Detig et al. (2012); Hormozdiari et al. (2009); Chen et al. (2009); Suzuki et al. (2014); Zhu et al. (2018)). Breakpoints in *Anopheles* mosquitoes are characterized by long, repeated sequences (Sharakhov et al. (2006); Lobo et al. (2010)), however, which has prohibited break point detection using these existing sequence alignment-based methods (Zhu et al. (2017, 2018)).

An alternative approach that can use single-nucleotide polymorphism (SNP) data would be even more attractive because it would not require specialized sequencing (e.g., long reads generated from high molecular weight DNA). SNP data are used for a wide range of analyses and are inexpensive to generate using commonly-available next-generation sequencing (NGS) techniques. Prior work has used Principal Component Analysis (PCA). For example, PCA of SNP data is widely used in population

47 genetics to visualize the relationships between samples (Neafsey et al. (2010)), correcting for stratification  
48 in genome-wide association studies (Price et al. (2006)), and with clustering to determine population  
49 structure (Lee et al. (2009); Patterson et al. (2006)).

50 Inversion differences within a population can also appear as clusters in PCA projections (Ma and  
51 Amos (2012); Ma et al. (2014)), which has motivated computational detection based on characterizing  
52 this observed cluster structure (Cáceres and González (2015)). Because not all data induce a clear pattern  
53 in PCA projection plots, we were motivated to develop an alternative method based on single-SNP  
54 association tests (see Nowling and Emrich (2018c)). PCA is first performed on the entire set of SNPs  
55 from a single chromosome. For each PC, single-SNP association tests are performed against the samples'  
56 projected PC coordinates. The spatial relationships of the associations are then visualized with Manhattan  
57 plots to reveal inversions. We applied this method to 34 *An. gambiae* and *An. coluzzii* samples (from  
58 Fontaine et al. (2015)) from four geographic locations. No clear cluster structure was distinguishable  
59 due to small sample sizes and confounding factors, but our method still was able to successfully detect  
60 and localize a major inversion (2La, confirmed against experimental karyotyping labels) and multiple  
61 inversions on 2R.

62 Here, we focus on factors that we found confound PCA-based cluster analysis. We note that prior  
63 work (see Ma and Amos (2012); Cáceres and González (2015)) focus on human genomes, which tend  
64 to be easier for making inferences. In support of this, we use invertFREGENE to simulate and evaluate  
65 an ideal situation with a single population and a single inversion. Using *Drosophila* and *Anopheles* data,  
66 however, provides test cases for evaluating large inversion detection when the biology is not as clear. For  
67 example, the 198 *Drosophila melanogaster* fly samples from the *Drosophila* Genetics Reference Panel  
68 2 (DGRP2) (Mackay et al. (2012); Huang et al. (2014)) include multiple, overlapping inversions on the  
69 3R chromosome arm. *Anopheles* data have been previously analyzed with PCA and found to cluster  
70 based on combinations of inversion karyotype, species, and geography (Fontaine et al. (2015); Neafsey  
71 et al. (2010); Miles et al. (2016); Nowling and Emrich (2018c)). This allows using 150 Burkina Faso *An.*  
72 *gambiae* and *An. coluzzii* mosquito samples to look at the effect of species–inversion interactions (Miles  
73 et al. (2016)), and the re-analysis of the 34 *An. gambiae* and *An. coluzzii* samples (from Fontaine et al.  
74 (2015)) to look more deeply at species–population–inversion interactions.

75 We confirm that identification and localization of inversions using PCA can be an easier task because  
76 the clustering required for karyotyping is not always clear. For example, Cáceres and González used  
77 Gaussian mixture models to cluster samples from PCA projections and then performed a likelihood-ratio  
78 test based on the presence of three clusters corresponding to the three expected inversion orientations  
79 (Cáceres and González (2015)). The clusters obtained from these well-characterized insect data with  
80 experimentally determined karyotypes, however, are not always the three expected inversion orientations.  
81 Using our framework, we then tried performing single-SNP association tests against the cluster labels  
82 (instead of against the projected PC coordinates) to determine if they are more robust. Although we could  
83 accurately infer karyotypes, we also remain susceptible to data with either multiple inversions or from  
84 closely related species. This is in some sense expected given the role of PCA in population inference  
85 and other more traditional population genetics analysis (Lee et al. (2009); Patterson et al. (2006); Price  
86 et al. (2006); Neafsey et al. (2010)). For these more complex cases, we show that populations need to be  
87 analyzed individually and care must be taken when choosing which PCs and cluster number to use. We  
88 show that our PC-SNP association tests are easier to use and more robust in large part since they do not  
89 depend on accurately clustering samples to detect inversions like other PCA-based approaches.

## 90 METHODS

### 91 *Data Sets*

92 We use invertFREGENE for the simulated data set (O'Reilly et al. (2010)). We use default parameters for  
93 the mutation rate ( $2.3 \times 10^{-7}$ ), recombination rate ( $1.25 \times 10^{-7}$ ), proportion of crossovers in recombina-  
94 tion hot spots (0.88), length of crossover hot spots (2000), per-base gene-conversion rate ( $4.5 \times 10^{-8}$ ),  
95 and gene-conversion length (500). We simulate 1000 2Mb haploid chromosomes (created from a single  
96 founder) in one population and no inversions for 10,000 generations to equilibrate. We introduce an  
97 inversion from 0.75 Mb to 1.25 Mb and continued the simulation for another 10,000 generations (or until  
98 the inversion frequency reached 50%). We set the MaxFreqOfLostInv parameter to 10% and set the output  
99 mode to “sequence” mode. We modify invertFREGENE to output inversion orientations of the haploids.  
100 We wrote a custom script in Python to randomly sample haploids without replacement to produce diploid

101 individuals and write a VCF.

102 We also use three real and publicly-available data sets. For the samples from Fontaine et al. (2015),  
103 we retrieve the VCF files from the Dryad Digital Repository (Fontaine et al. (2014)), sample IDs from the  
104 supplemental materials of the paper, and use VCFtools (Danecek et al. (2011)) to remove all but the 34  
105 *Anopheles gambiae* and *Anopheles coluzzii* samples. Similarly, we retrieve VCF files and sample IDs for  
106 the phase 1 AR3 data release from the 1000 *Anopheles* genome project web site and use VCFtools to  
107 remove all but the 150 Burkina Faso samples.

108 The *Drosophila* samples required more processing. We retrieve the VCF file for the *Drosophila*  
109 Genetics Reference Panel v2 (Huang et al. (2014); Mackay et al. (2012)) from the project web site. We  
110 use VCFtools to create a separate VCF file for each chromosome arm (2L, 2R, 3L, 3R, and X). We remove  
111 seven samples (lines 348, 350, 358, 385, 392, 395, and 399) that appear to be outliers and then filter each  
112 VCF file to only keep biallelic SNPs.

### 113 **Feature Matrix Encoding**

114 Assume that we have  $N$  samples with  $V$  positions with biallelic variants. Each position has a reference  
115 allele and an alternative allele, and at each position, each sample has one of three genotypes (homozygous  
116 reference, homozygous alternate, or heterozygous).

117 We encode the variants as a feature matrix  $\mathbf{X}$  with dimensions  $N \times 3V$ . If sample  $i$  has the homozygous  
118 reference genotype at position  $k$ , then we set  $\mathbf{X}_{i,3k+1} = 1$ . If sample  $i$  has the homozygous alternate  
119 genotype at position  $k$ , then we set  $\mathbf{X}_{i,3k+2} = 1$ . If sample  $i$  has the heterozygous genotype at position  $k$ ,  
120 then we set  $\mathbf{X}_{i,3k+3} = 1$ . If the genotype of sample  $i$  is unknown at position  $k$ , then we do nothing.

### 121 **Principal Component Analysis (PCA)**

Principal component analysis (PCA) of the feature matrix  $\mathbf{X}$  produces a  $3V \times P$  matrix  $\mathbf{W}$  of principal  
components and a  $N \times P$  matrix  $\mathbf{T}$  of projected coordinates for the samples such that:

$$\mathbf{T} = \mathbf{XW}$$

122 As directly computing PCA would involve computing a  $3V \times 3V$  co-variance matrix, we use a  
123 randomized PCA method as implemented in Scikit Learn (Pedregosa et al. (2011)). Whitening is applied  
124 to the resulting PCs. We use plots of the explained variance ratios to select relevant PCs.

### 125 **Inferring Karyotypes with K-Means Clustering**

126 Sample karyotypes are inferred by clustering samples using their their projected coordinates ( $\mathbf{T}$ ) from  
127 PCA. Clustering is performed with the k-means clustering algorithm as implemented in Scikit Learn  
128 (Pedregosa et al. (2011)). We choose the number of clusters  $K$  by clustering the samples with 1-6 clusters,  
129 plotting the inertia (or sum-of-squared errors), and visually identifying the “elbow” in the plot. We use  
130 the default Scikit Learn settings of 10 runs.

131 The cluster labels can be represented by a  $N \times K$  matrix  $\mathbf{C}$ . Each sample  $i$  belongs to one of  $K$  clusters,  
132 indicated by a value of 1 at position  $\mathbf{C}_{i,j}$  where  $1 \leq j \leq K$ .

133 In cases where we know the karyotypes, we can evaluate the accuracy of the inferred karyotypes from  
134 clustering. We generate a confusion matrix for the cluster assignments versus the known karyotypes.  
135 From the matrix, we calculate the balanced accuracy of predicting the clusters from the known karyotypes.  
136 This set up penalizes situations where the number of clusters is larger than the number of real karyotypes.  
137 Balanced accuracy re-weights the accuracy for each class so that each class has equal weight to avoid  
138 over-estimating accuracy if poor predictions happen in minority classes.

### 139 **Review of Association Testing**

140 We review associating testing with Logistic Regression models. Likelihood-ratio tests can be used to  
141 test for association between variables. The null hypothesis is that knowing the independent variable  
142 does not improve the accuracy of predicting the dependent variable, while the alternative hypothesis is  
143 that knowing the value of the independent variable does improve accuracy of predictions because the  
144 independent variable is associated with the dependent variable.

145 In our case, we use a Logistic Regression model, which is appropriate when the independent variable  
146 is categorical. The equation for a Logistic Regression model is given by:

$$P(\mathbf{y}_i) = \frac{1}{1 + \exp(-\beta \mathbf{X}_i + \beta_0)} \quad (1)$$

147 where  $y_i$  is value of the dependent variable for sample  $i$ ,  $\mathbf{X}_i$  is a vector of values for the independent  
148 variables for sample  $i$ , and  $\beta_0$  is the intercept.

149 To evaluate the hypothesis, we compare predictions from a pair of models. The alternative model  
150 contains the same dependent variables as the null model plus the additional independent  
151 variable(s) being tested against the dependent variable for association. In our case, the null model  
152 only contains an intercept (no independent variables) and the alternative model will contain a single  
153 independent variable. In cases where the output variable is categorical rather than binary, a one-versus-all  
154 scheme is used. One pair of models is trained for each category and predicts the probability that the value  
155 of the independent variable is equal to that category.

After fitting the models, we use the models to predict the independent variable for the samples. From  
the predictions, we calculate the likelihood for each model. The likelihood for the multinomial Logistic  
Regression model is given by (Hosmer Jr. et al. (2013)):

$$L = \prod_{i=1}^N \prod_g P(y_{i,g})^{y_{i,g}} \quad (2)$$

156 where  $g$  is the number of categories the dependent variable can take on.

To perform the likelihood-ratio test, the difference  $G$  between the log likelihoods of the two sets of  
models is calculated by:

$$G = -2(\log L_0 - \log L_A) \quad (3)$$

157 where  $L_0$  and  $L_A$  are the likelihoods of the null and alternative models, respectively.

The  $p$ -value for the difference in log likelihoods is calculated using the  $\chi^2$  distribution:

$$p = P[\chi^2(df) > G] \quad (4)$$

158 where  $df$  is the difference in the number of degrees of freedom (weights) between the two models.

159 Scikit Learn is used; we train the models using Stochastic Gradient Descent (SGD) for 10,000 epochs,  
160 the log likelihood,  $L_2$  regularization using the `SGDClassifier` class. All other parameters are left at  
161 their defaults. The log likelihoods are calculated with the `log_loss` function (normalize set to `False`).  
162 We implement functionality for calculating  $G$  and estimating the  $p$ -value using Scipy.

### 163 **Localizing Inversions with Cluster-SNP Association Tests**

164 After karyotypes are inferred with clustering, we perform association tests between each SNP and the  
165 samples' cluster labels. The cluster labels are used as the independent variables ( $\mathbf{y}$ ), while the genotypes  
166 of the SNPs are used as the independent variables ( $\mathbf{X}$ ).

167 It is common for genotypes in insect SNP data to be unknown (uncalled). We use our approach from  
168 Nowling and Emrich (2018a,b) to adjust the association tests to avoid bias. For fitting the models, we  
169 deterministically up-sample the samples (one copy for each possible genotype). In particular, if we have  
170  $M$  genotypes, we create  $M$  copies of each sample. (In our case,  $M = 3$  since we are working with biallelic  
171 SNPs with three genotypes.) If the genotype is known, the copies have the same genotype as the original.  
172 Otherwise, we make the conservative assumption that there is an uninformative (uniform) prior over the  
173 genotypes and impute the copies so that there is a one-to-one relationship between the copies and possible  
174 genotypes. Additionally, we fix the intercept to the class probabilities and did not allow it to be changed  
175 during fitting. For prediction and evaluation of the likelihood, we use original input data.

### 176 **Localizing Inversions with PC-SNP Association Tests**

177 In Nowling and Emrich (2018c), we described a second approach for localizing inversions in which  
178 association tests are performed between each SNP and the samples' PC projected coordinates ( $T$ ) from  
179 PCA. A single association test is performed for each combination of principal component (PC)  $j$  and SNP  
180 position  $k$ , using the coordinate  $T_{i,j}$  for sample  $i$  along PC  $j$  as the independent variable. As the SNPs are  
181 encoded as categorical variables, three dependent variables (one for each genotype) are used for each SNP.  
182 We employ three Logistic Regression models, one for each genotype, in a one-versus-all scheme.

183 As the SNPs are the dependent variables, we need a different strategy for handling missing genotypes.  
184 We review the method we proposed in Nowling and Emrich (2018c). We deterministically up-sample  
185 the samples (one copy for each genotype). In particular, if we have  $M$  genotypes, we create  $M$  copies

186 of each sample. (In our case,  $M = 3$  since we are working with biallelic SNPs with three genotypes.)  
187 If the genotype is known, the copies have the same genotype as the original. Otherwise, we make the  
188 conservative assumption that there is an uninformative (uniform) prior over the genotypes and impute the  
189 copies so that there is a one-to-one relationship between the copies and possible genotypes. We also fix  
190 the intercept to the class probabilities and did not allow it to change during fitting. Note that unlike the  
191 approach for the cluster-SNP association tests, the up-sampled data are used for both fitting the models  
192 and in predictions for the calculations of the likelihoods.

Since we increased the number of samples, we need to weight the samples so that the calculated  $p$ -values are consistent with the original number of samples. The modified likelihood function is then:

$$L = \prod_{i=1}^N \prod_g P(\mathbf{y}_{i,g})^{y_{i,g}/M} \quad (5)$$

### 193 **Software Implementation**

194 We implement our method in Asaph, our open-source toolkit for variant analysis. Asaph is implemented in  
195 Python using Numpy / Scipy (Walt et al. (2011)), Matplotlib (Hunter (2007)), and Scikit-Learn (Pedregosa  
196 et al. (2011)) and is available at <https://github.com/rnowling/asaph> under the Apache  
197 Public License v2.

## 198 **RESULTS**

### 199 **Analysis of Simulated Inversions**

200 We first simulate 500 diploid individuals with a single 2 Mb chromosome containing a single inversion  
201 spanning 0.75Mb to 1.25Mb using invertFREGENE (O'Reilly et al. (2010)). The inverted and standard  
202 homozygotes each corresponded to 25% of the samples, while 50% of the samples are heterozygous.

203 Explained variance ratios for the PCA of the invertFREGENE data indicates that three PCs are needed  
204 to explain most of the variation, but cluster structure was only present in the projection plot for PCs 1  
205 and 2 (see Figure 1a-c). K-means identifies three clusters (see Figure 1d). The balanced accuracy for  
206 predicting clusters assignments from karyotype labels was 100.0%, which indicates a perfect one-to-one  
207 relationship between the three clusters and three inversion karyotypes. Significantly, a Manhattan plot  
208 of the SNPs' associations with the cluster labels indicate the presence of the inversion in the expected  
209 location (see Figure 1e).

210 These simulations confirmed that PCA and k-means clustering of SNPs can be used to infer inversion  
211 karyotypes by validating the assigned clusters against the known karyotype labels. Further, association  
212 tests between the clusters and SNPs can localize the inversion along the chromosome.

### 213 **Analysis of *Drosophila* Inversions**

214 Samples in the *Drosophila* Genetics Reference Panel 2 (DGRP2) data contain multiple inversion karyo-  
215 types and are drawn from a single population. Only five inversions are present in five or more samples  
216 (Huang et al. (2014)). The 2L and 2R chromosome arms each contain a single inversion ( $ln(2L)t$ ,  
217  $ln(2R)NS$ ) and all three orientations are present for each inversion. Three inversions ( $ln(3R)P$ ,  $ln(3R)K$ ,  
218 and  $ln(3R)Mo$ ) are present on the 3R chromosome arm. The three inversions overlap and the inverted  
219 orientations are nearly mutually exclusive in the DGRP2 samples (see Tables 1–3).

220 The explained variance ratios from PCAs of the *Drosophila* 2L and 2R SNPs indicates that two PCs  
221 per arm are needed to explain most of the variation. In each case, k-means identifies three clusters. The  
222 Manhattan plots of the SNPs' associations with the cluster labels indicates that the clusters are capturing  
223 the inversions (see Figures 2d and 3d). The clusters are strongly associated with the karyotypes labels;  
224 balanced accuracies for predicting the cluster assignments from the karyotype labels are 93.3% ( $ln(2L)t$ )  
225 and 94.4% ( $ln(2R)NS$ ), respectively.

226 The inversion story for the 3R chromosome arm is more complicated. Three inversions ( $ln(3R)P$ ,  
227  $ln(3R)K$ , and  $ln(3R)Mo$ ) on 3R are present in more than five of the DGRP2 samples (Huang et al. (2014)),  
228 and although these three inversions overlap the inverted orientations are nearly mutually exclusive in the  
229 DGRP2 samples (see Tables 1–3). For these data PCA and clustering are not able to accurately karyotype;  
230 two PCs explained most of the variation (see Figure 4a) and k-means clustering using PCs 1 and 2 finds  
231 three clusters (see Figure 4c), but the clusters do not correlate with the orientations of any single inversion.



232 Balanced accuracies for predicting clusters assignments from karyotype labels are 55.0% (*In(3R)K*),  
233 60.7% (*In(3R)mo*), and 43.3% (*In(3R)p*).

234 SNP-cluster association tests, however, are able to localize the region on 3R containing the *In(3R)K*  
235 and *In(3R)Mo* inversions but are unable to disambiguate the overlapping inversions. In the Manhattan  
236 plots, SNPs associated with the clusters are localized to a large region starting at 15 Mbp and span the rest  
237 of the arm, and as such the region appears as to contain one large inversion (see Figure 4d).

238 Association tests between the PCs and karyotype labels offer an explanation. The first PC divides the  
239 two highest-frequency orientations, while the second PC divides the third highest-frequency orientation  
240 from the the rest. With multiple mutually-exclusive inversions, however, the two highest-frequency,  
241 mutually-exclusive orientations (homozygous inverted *In(3R)Mo* and heterozygous *In(3R)K*) do not  
242 belong to the same inversion. Hence, 3R-PC 1 divides the samples with the homozygous inverted  
243 orientation of *In(3R)Mo* and heterozygous inversion of *In(3R)K* from the rest. As a result, PCA methods  
244 are not successful on 3R because the results could be interpreted computationally as a single inversion  
245 when given these three mutually-exclusive but overlapping inversions.

### 246 **Analysis of inversions found in less closely related samples**

247 We also analyze Burkina Faso *Anopheles gambiae* and *Anopheles coluzzii* samples from the 1000  
248 *Anopheles* genomes project. The samples samples were karyotyped for the 2La and 2Rb inversions. Not  
249 all karyotypes are present for the 2La inversion, however, which complicates detection and karyotyping  
250 because none of the samples are homozygous for the standard 2La karyotype and only a single *An. coluzzii*  
251 sample is heterozygous (see Table 5).

252 We repeat the approach of inferring karyotypes to the 2L and 2R chromosome arms of a total of 150  
253 Burkina Faso *Anopheles gambiae* and *Anopheles coluzzii* samples. PCA of the samples detects differences  
254 between species and inversion karyotypes as previously reported (see Figures 6a and 5a). Because the  
255 resulting clusters combine species and karyotype, isolation of the inversion effects and localization of the  
256 inversions is difficult using this method.

257 We therefore divide the samples by species and perform PCA on each species separately. Since only a  
258 single *An. coluzzii* sample is inverted for 2La, none of the PCs had large explained variance ratios and  
259 we are unable to use PCA to karyotype these *An. coluzzii* samples or localize the 2La inversion. For *An.*  
260 *gambiae*, k-means identifies two clusters, corresponding to the homozygous inverted and heterozygous  
261 orientations (balanced accuracy of 100.0%). The location of the 2La inversion is clearly indicated based  
262 on a Manhattan plot generated from the association test results (see Figure 5f).

263 For 2R, two PCs explains most of the variance for the *An. coluzzii* samples, while one PC explains  
264 most of the variance for the *An. gambiae* samples; in both cases, we find that using only the first PC  
265 produces the best clustering results. K-means identifies two clusters of *An. gambiae* samples, which  
266 correlate perfectly with the homozygous inverted and heterozygous orientations, and the balanced accuracy  
267 for predicting clusters assignments from karyotype labels is also 100.0% for *An. gambiae* and *An. coluzzii*  
268 even though the two homozygous standard samples are not detected as a separate cluster. Manhattan  
269 plots generated from the SNP-cluster association results successfully localizes the 2Rb inversion in both  
270 species (see Figures 6f and 6j).

271 Notably, the Manhattan plots suggest that the 2Rc inversion (Main et al. (2015)) may also be present  
272 in some of the *An. coluzzii* samples even though they were not karyotyped for 2R inversions other than  
273 2Rb. When the 2Rb and 2Rc inversions appear together, they are designated as the 2Rbc system (Caputo  
274 et al. (2014)). The presence of 2Rc (2Rbc) in some of the *An. coluzzii* samples may explain why the  
275 karyotypes from the two species did not cluster together along PC 2 when the 150 samples are analyzed  
276 together.

### 277 **Multiple Inversions, Multiple Species, Multiple Populations**

278 We apply our approach to the analysis of 34 *Anopheles gambiae* and *Anopheles coluzzii* samples from  
279 four geographic locations (Burkina Faso, Cameroon, Mali, and Tanzania) (Fontaine et al. (2015)). These  
280 samples were karyotyped for the 2La inversion, but not inversions on the 2R chromosome arm.

281 The 2La karyotype labels between the 34 *Anopheles* and 150 Burkina Faso *Anopheles* samples may  
282 not be consistent: 2La homozygous inverted orientation is not observed among the 7 Burkina Faso samples  
283 from the 34 total *Anopheles* samples, while the 2La homozygous standard orientation is not observed  
284 among the 150 Burkina Faso *Anopheles* samples (see Tables 5 and 8).

285 The 2La inversion forms are associated with both species and locations. Samples from Cameroon  
286 are primarily homozygous for the inverted orientation, while samples from Burkina Faso and Mali are  
287 primarily homozygous for the standard orientation (see Table 7). Five samples from across locations  
288 are heterozygous. All three orientations were observed in *An. gambiae* samples, while *An. coluzzii*  
289 samples are homozygous for either the standard or inverted orientations (see Table 8). Due in part to the  
290 small sample size, we conclude that the inversion karyotypes are not easily separated from the species or  
291 geographic location in this initial analysis.

292 Two PCs explain most of the variance for the 2L SNPs. Using PC 1, k-means is able to identify three  
293 clusters. The balanced accuracy for predicting clusters assignments from karyotype labels is 100.0%.  
294 Manhattan plots from the SNP-cluster association tests successfully localizes the 2La inversion (see  
295 Figure 7).

296 We also identify inversions on 2R (see Figure 8). Four PCs explain most of the variance. K-mean  
297 identifies three clusters using PCs 1 and 2. Association tests with the clusters labels from PCs 1 and 2  
298 identify potential inversions. There are multiple inversions (e.g., 2Rj, 2Rb, 2Rc, and 2Rj) on 2R, including  
299 several (e.g., 2Rbk, 2Rcu, 2Rbu, and 2Rd) that overlap (Main et al. (2015); Caputo et al. (2014)). The  
300 Manhattan plot shows associated SNPs in the 2Rj inversion region near the front of the chromosome arm.  
301 The second set of associated SNPs do not overlap entirely with the 2Rb inversion and could potentially  
302 belong to the 2Rbk or 2Rcu inversion systems (Caputo et al. (2014)). The eight *An. gambiae* samples  
303 from Mali formed one of the three clusters, suggesting that the potential inversions captured are present  
304 (or absent) predominantly in Mali.

305 Three clusters are identified using PCs 3 and 4. The 2Rb inversion is present in the corresponding  
306 Manhattan plot, although not clearly. We re-clustered the samples separately for each PC. Two to three  
307 clusters are identified for each PC. The Manhattan plot for the PC 4 clusters reveals the 2Rb inversion  
308 clearly, while the Manhattan plot for the PC 3 clusters does not indicate an inversion. PC 4 captures the  
309 2Rb inversion, while PC 3 likely captures something other than an inversion. Although these samples are  
310 not karyotyped for 2R inversions, the presence of the 2Rb inversion is expected based on its presence in  
311 the larger 150 Burkina Faso set of samples.

## 312 Comparison to PC-SNP Association Tests

313 In previous sections, we evaluate PCA and clustering for inferring inversion karyotypes and association  
314 tests with the cluster labels for localizing inversions. We previously described an alternative approach  
315 in which association tests are performed directly against the projected PC coordinates (no intermediate  
316 clustering step) (Nowling and Emrich (2018c)). PC-SNP association tests are able to detect and localize  
317 inversions but unable to infer karyotypes. For completeness we re-analyze the above data using our  
318 alternative PC-SNP association test approach.

319 For the cases with a single inversion and no population structure, the two methods are equal in their  
320 ability to localize inversions. The inversion in the invertFREGENE simulation is localized by PCs 1  
321 and 2 (see Figures 9a and 9b); PC 3 captures an unrelated effect. The *Drosophila In(2L)t* and *In(2R)NS*  
322 inversions are localized by the first PC for each chromosome arm (see Figures 10a and 9c); the second  
323 PCs capture differences between homozygous and heterozygous karyotypes (see Table 4), but do not  
324 localize the inversion.

325 PC-SNP association tests are more robust to population structure and confounding factors. For the  
326 150 Burkina Faso samples, we observed that the PC 1 captures differences between species, while PC  
327 2 captures the inversions. Accordingly, association tests against the second PCs localize the 2La and  
328 2Rb inversions (see Figures 11b and 11d). For the 34 *Anopheles* samples, the 2La inversion is localized  
329 by association tests against 2L-PC 1 (see Figure 11a), the 2Rb inversion is localized by 2R-PC 4 (see  
330 Figure 11h), and as hypothesized earlier, 2R-PC 2 is capturing inversions what might be the 2Ru and  
331 2Rcu or 2Rbk inversion systems (see Figure 11d).

332 Finally, we observe that the association tests against the projected coordinates do not resolve the  
333 ambiguity from the multiple overlapping inversions on the 3R chromosome arm of the 198 *Drosophila*  
334 samples. Only 3R-PC 1 appears to localize an inversion (see Figure 10e), and the enriched region appears  
335 as a single inversion.

## 336 DISCUSSION

337 We evaluate PCA-based frameworks for detecting, localizing, and karyotyping inversions from SNPs.  
338 Although both approaches (cluster-SNP associations and PC-SNP associations) are practical and useful  
339 for identifying large inversions, there are trade offs. While the cluster-based approach is able to infer  
340 karyotypes, it requires choosing an appropriate combination of PCs and the right number of clusters. The  
341 second approach has fewer requirements but cannot infer karyotypes.

342 When applied to simulated and real data (*Drosophila* 2L and 2R chromosome arms) with a single  
343 inversion and a single population, both methods readily detect and localize the inversions while the  
344 cluster-based approaches are able to correctly infer karyotypes.

345 Sample data with more complicated inversions and population structure proved more challenging.  
346 While the *Drosophila* 3R chromosome arm has three overlapping and mutually-exclusive inversions,  
347 PCA only indicates one inversion with three karyotypes. Without prior knowledge of the karyotypes,  
348 the results from PCA could be misinterpreted. Using data with multiple, closely-related species, PCA  
349 analysis detects the differences in species as well as the inversions. We found it necessary to analyze  
350 the 150 Burkina Faso *Anopheles* samples separately by species to accurately resolve the karyotypes and  
351 inversions. We observe the expected 2Rb inversion, but we also observe the presence of the 2Rc inversion  
352 within some *An. coluzzii* samples. We note that not knowing *a priori* that the 2Rc inversion was present  
353 could explain why the karyotypes from the two species did not initially cluster as expected. For 2La, we  
354 are able to accurately resolve karyotypes for the *An. gambiae* samples, but we are not able to analyze the  
355 *An. coluzzii* samples as only one sample had a different karyotype.

356 Our framework described here enables karyotyping of inversions that had not been experimentally  
357 assessed. For example, by analyzing the 150 Burkina Faso *Anopheles* samples separately by species, we  
358 found potential 2Rc inverted regions in *An. coluzzii* (but not *An. gambiae*). Although the 34 *Anopheles*  
359 samples were not karyotyped for inversions on the 2R chromosome arm, we identify the potential presence  
360 of the 2Rj, and 2Rcu or 2Rbk inversions systems and their association with samples from Mali. Likewise,  
361 we confirm the presence of the 2Rb inversion in the 34 original *Anopheles* samples, which is expected  
362 given its presence in the Burkina Faso *Anopheles* samples.

363 In summary, not all PCs identify inversions when confounding factors are present. This will affect  
364 methods based purely on cluster structure in PCA projection (e.g., Ma et al. (2014); Cáceres and González  
365 (2015)); by using association tests and Manhattan plots, our proposed framework is able to distinguish  
366 between PCs capturing inversions versus others. This is expected given the role of PCA in population  
367 inference and other tasks (Lee et al. (2009); Patterson et al. (2006); Price et al. (2006); Neafsey et al.  
368 (2010)). It also is somewhat expected given prior modifications to augment PCA-based inversion detection.  
369 For example, Cáceres, et al. also analyzed linkage disequilibrium (Cáceres and González (2015); Sindi and  
370 Raphael (2010); Cáceres et al. (2012)) to better localize the inversions predicted by their likelihood-ratio  
371 framework, which assumes there will be three PCA clusters. Real-world data, however, violate typical  
372 assumptions due to confounding factors (species differences, more than three or muddled clusters) or  
373 unobserved karyotypes (two clusters instead of three), and we provide concrete examples for future  
374 evaluation of SNP-based inversion detection. In cases where the choice of PCs and number of clusters is  
375 ambiguous, the visualization of the associations provided by our cluster-SNP association approach can  
376 guide the required choices, which we show using inversions on the 2R arm in the *Anopheles* samples.  
377 Further, if karyotyping is not needed, our approach based on PC-SNP association tests eliminates the  
378 requirement of clustering completely.

## 379 CONCLUSIONS

380 PCA-based frameworks can be used to detect, localize and karyotype inversions using only SNPs. We  
381 assess these approaches using data that varied in complexity from a single inversion in simulated samples  
382 to real sequencing data with multiple overlapping inversions, generated from multiple species and multiple  
383 geographic locations. Although we detect inversions on 2R in *Anopheles* data that had not been previously  
384 annotated, our analysis also confirms that PCA-based clustering can be affected by confounding factors,  
385 of which we present two actual manifestations for future SNP-based inversion detection assessment.



386 **ACKNOWLEDGMENTS**

387 We would like to thank Michelle Riehle, Katrina Schlum, Jenica L. Abrudan, Christopher Beal, Derek  
 388 Riley, and Josiah Yoder for insightful discussions and feedback that have improved our study and  
 389 manuscript. RJN and KRM gratefully acknowledge MSOE for funding.

390 **FIGURES**

**Table 1.** Co-occurrences of *In(3R)Mo* and *In(3R)K* Inversion Karyotypes in 198 *Drosophila* Samples

|                |            | <i>In(3R)Mo</i> |         |           |
|----------------|------------|-----------------|---------|-----------|
|                |            | Homo. Std.      | Hetero. | Homo. Inv |
| <i>In(3R)K</i> | Homo. Std. | 167             | 8       | 17        |
|                | Hetero.    | 9               | 1       | 0         |
|                | Homo. Inv  | 3               | 0       | 0         |

**Table 2.** Co-occurrences of *In(3R)Mo* and *In(3R)P* Inversion Karyotypes in 198 *Drosophila* Samples

|                |            | <i>In(3R)Mo</i> |         |           |
|----------------|------------|-----------------|---------|-----------|
|                |            | Homo. Std.      | Hetero. | Homo. Inv |
| <i>In(3R)P</i> | Homo. Std. | 169             | 9       | 17        |
|                | Hetero.    | 6               | 0       | 0         |
|                | Homo. Inv  | 4               | 0       | 0         |

**Table 3.** Co-occurrences of *In(3R)K* and *In(3R)P* Inversion Karyotypes in 198 *Drosophila* Samples

|                |            | <i>In(3R)K</i> |         |           |
|----------------|------------|----------------|---------|-----------|
|                |            | Homo. Std.     | Hetero. | Homo. Inv |
| <i>In(3R)P</i> | Homo. Std. | 182            | 10      | 3         |
|                | Hetero.    | 6              | 0       | 0         |
|                | Homo. Inv  | 4              | 0       | 0         |

**Table 4.** Association Tests Between Principal Components and Inversion Karyotypes of *Drosophila* Samples. PCA was performed separately for each chromosome, so the PC columns refer to the PCs for the chromosome of the given inversion.

|                 |                        | Comparison | PC1 | PC2 |
|-----------------|------------------------|------------|-----|-----|
| <i>In(2L)t</i>  | Inverted vs Not        |            | x   |     |
| <i>In(2L)t</i>  | Homo. Inverted vs Rest |            |     |     |
| <i>In(2L)t</i>  | Hetero. vs Rest        |            |     | x   |
| <i>In(2R)ns</i> | Inverted vs Not        |            | x   |     |
| <i>In(2R)ns</i> | Homo. Inverted vs Rest |            |     |     |
| <i>In(2R)ns</i> | Hetero. vs Rest        |            |     | x   |
| <i>In(3R)P</i>  | Inverted vs Not        |            |     |     |
| <i>In(3R)P</i>  | Homo. Inverted vs Rest |            |     |     |
| <i>In(3R)P</i>  | Hetero. vs Rest        |            |     |     |
| <i>In(3R)K</i>  | Inverted vs Not        |            |     |     |
| <i>In(3R)K</i>  | Homo. Inverted vs Rest |            |     |     |
| <i>In(3R)K</i>  | Hetero. vs Rest        |            | x   | x   |
| <i>In(3R)Mo</i> | Inverted vs Not        |            |     |     |
| <i>In(3R)Mo</i> | Homo. Inverted vs Rest |            | x   |     |
| <i>In(3R)Mo</i> | Hetero. vs Rest        |            |     |     |

**Table 5.** Occurrences of 2La Inversion Karyotypes By Species for 150 Burkina Faso *Anopheles* Samples

|                     | 2La        |         |           |
|---------------------|------------|---------|-----------|
|                     | Homo. Std. | Hetero. | Homo. Inv |
| <i>An. coluzzii</i> | 0          | 1       | 68        |
| <i>An. gambiae</i>  | 0          | 15      | 66        |

**Table 6.** Occurrences of 2Rb Inversion Karyotypes By Species for 150 Burkina Faso *Anopheles* Samples

|                     | 2Rb        |         |           |
|---------------------|------------|---------|-----------|
|                     | Homo. Std. | Hetero. | Homo. Inv |
| <i>An. coluzzii</i> | 33         | 29      | 7         |
| <i>An. gambiae</i>  | 2          | 24      | 55        |

**Table 7.** Occurrences of 2La Inversion Karyotypes By Location for 34 *Anopheles* Samples

|                     | 2La        |         |           |
|---------------------|------------|---------|-----------|
|                     | Homo. Std. | Hetero. | Homo. Inv |
| <b>Burkina Faso</b> | 5          | 2       | 0         |
| <b>Cameroon</b>     | 0          | 1       | 15        |
| <b>Mali</b>         | 8          | 0       | 0         |
| <b>Tanzania</b>     | 0          | 2       | 1         |

**Table 8.** Occurrences of 2La Inversion Karyotypes By Species for 34 *Anopheles* Samples

|                     | 2La        |         |           |
|---------------------|------------|---------|-----------|
|                     | Homo. Std. | Hetero. | Homo. Inv |
| <i>An. coluzzii</i> | 3          | 0       | 8         |
| <i>An. gambiae</i>  | 10         | 5       | 8         |

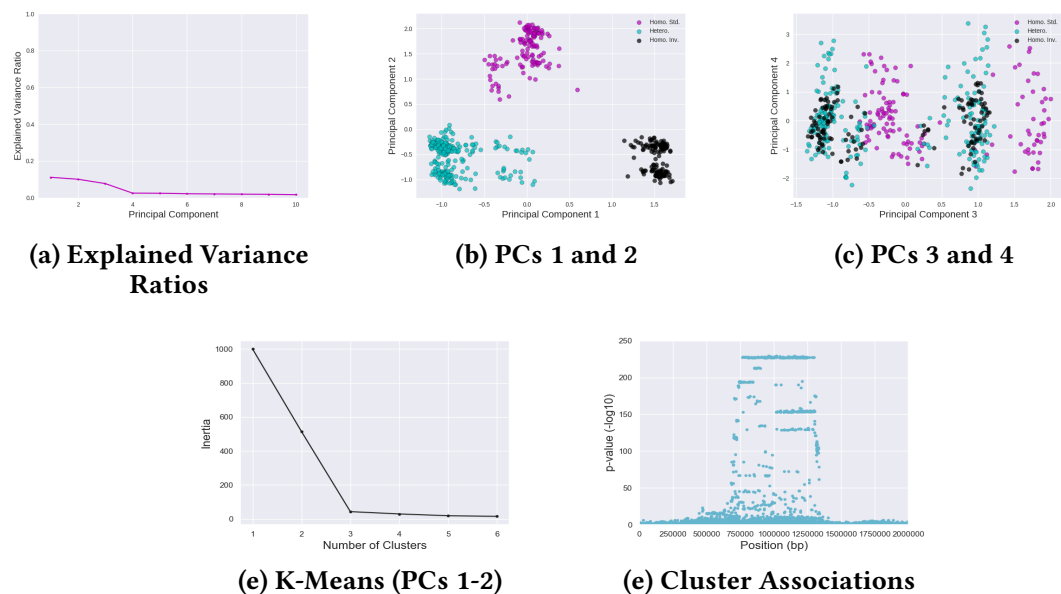

**Figure 1.** Analysis of SNPs from 500 Individuals Simulated with invertFREGENE with PCA, Clustering, and Cluster-SNP Association Tests. (a) Explained variance ratios, (b-c) PCA projection plots, and (d-f) Manhattan plots from Cluster-SNP association tests.

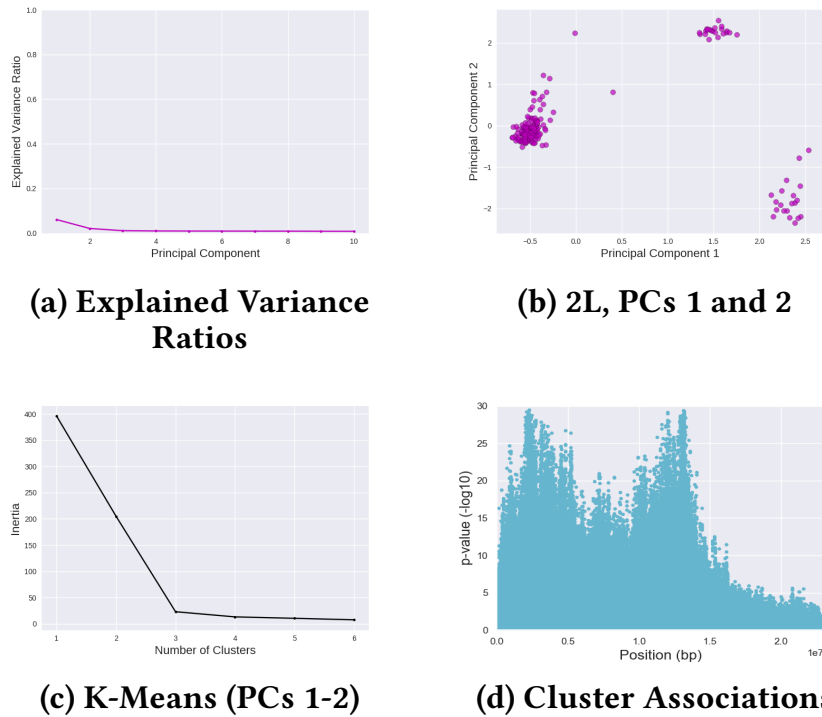

**Figure 2. Analysis of 2L Chromosome Arm SNPs of 198 *Drosophila* Samples with PCA, Clustering, and Cluster-SNP Association Tests** (a) Explained variance ratios, (b) PCA projection plot, (c) Inertia plot for K-Means clustering, and (d) Manhattan plots from Cluster-SNP association tests.

## 391 REFERENCES

- 392 Cáceres, A. and González, J. R. (2015). Following the footprints of polymorphic inversions on SNP data:  
393 from detection to association tests. *Nucleic Acids Res.*, 43(8):e53.
- 394 Cáceres, A., Sindi, S. S., Raphael, B. J., Cáceres, M., and González, J. R. (2012). Identification of  
395 polymorphic inversions from genotypes. *BMC Bioinformatics*, 13:28.
- 396 Caputo, B., Nwakanma, D., Caputo, F. P., Jawara, M., Oriero, E. C., Hamid-Adiamoh, M., Dia, I., Konate,  
397 L., Petrarca, V., Pinto, J., Conway, D. J., and Della Torre, A. (2014). Prominent intraspecific genetic  
398 divergence within anopheles gambiae sibling species triggered by habitat discontinuities across a  
399 riverine landscape. *Mol. Ecol.*, 23(18):4574–4589.
- 400 Chen, K., Wallis, J. W., McLellan, M. D., Larson, D. E., Kalicki, J. M., Pohl, C. S., McGrath, S. D.,  
401 Wendl, M. C., Zhang, Q., Locke, D. P., Shi, X., Fulton, R. S., Ley, T. J., Wilson, R. K., Ding, L., and  
402 Mardis, E. R. (2009). BreakDancer: an algorithm for high-resolution mapping of genomic structural  
403 variation. *Nat. Methods*, 6(9):677–681.
- 404 Corbett-Detig, R. B., Cardeno, C., and Langley, C. H. (2012). Sequence-based detection and breakpoint  
405 assembly of polymorphic inversions. *Genetics*, 192(1):131–137.
- 406 Danecek, P., Auton, A., Abecasis, G., Albers, C. A., Banks, E., DePristo, M. A., Handsaker, R. E., Lunter,  
407 G., Marth, G. T., Sherry, S. T., et al. (2011). The variant call format and vcf tools. *Bioinformatics*,  
408 27(15):2156.
- 409 Fontaine, M. C., Pease, J. B., Steele, A., Waterhouse, R. M., Neafsey, D. E., Sharakhov, I. V., Jiang, X.,  
410 Hall, A. B., Catteruccia, F., Kakani, E., et al. (2015). Extensive introgression in a malaria vector species  
411 complex revealed by phylogenomics. *Science*, 347(6217).
- 412 Fontaine, M. C., Pease, J. B., Steele, A., Waterhouse, R. M., Neafsey, D. E., Sharakhov, I. V., Jiang,  
413 X., Hall, A. B., Catteruccia, F., Kakani, E., Mitchell, S. N., Wu, Y.-C., Smith, H. A., Love, R. R.,  
414 Lawniczak, M. K., Slotman, M. A., Emrich, S. J., Hahn, M. W., and Besansky, N. J. (2014). Data from:  
415 Extensive introgression in a malaria vector species complex revealed by phylogenomics.

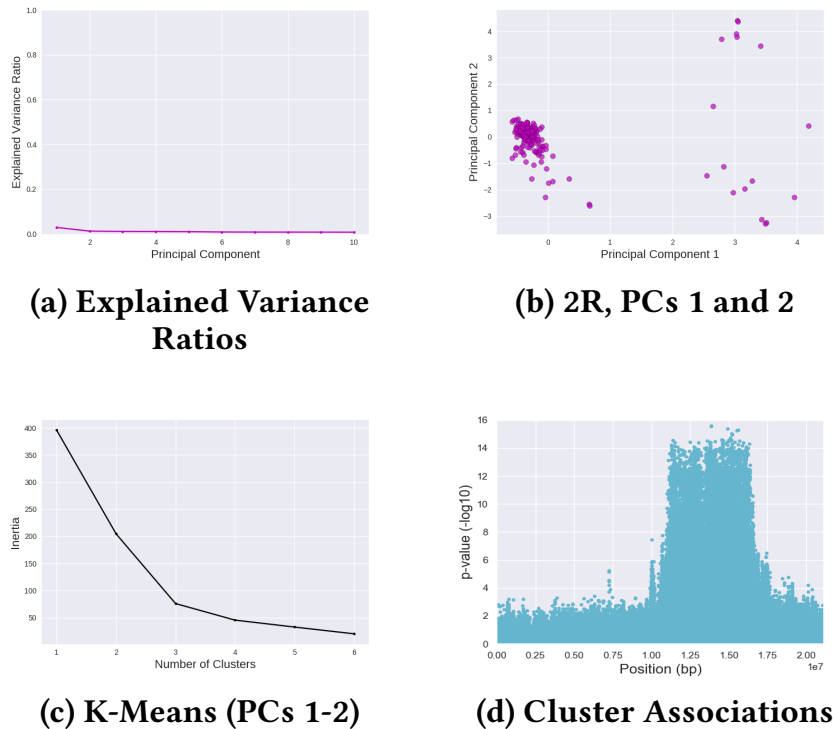

**Figure 3. Analysis of 2R Chromosome Arm SNPs of 198 *Drosophila* Samples with PCA, Clustering, and Cluster-SNP Association Tests** (a) Explained variance ratios, (b) PCA projection plot, (c) Inertia plot for K-Means clustering, and (d) Manhattan plots from Cluster-SNP association tests.

- 416 Fuller, Z. L., Leonard, C. J., Young, R. E., Schaeffer, S. W., and Phadnis, N. (2018). Ancestral polymor-  
417 phisms explain the role of chromosomal inversions in speciation. *PLoS Genet.*, 14(7):e1007526.
- 418 George, P., Sharakhova, M. V., and Sharakhov, I. V. (2010). High-resolution cytogenetic map for the  
419 african malaria vector *Anopheles gambiae*. *Insect Mol. Biol.*, 19(5):675–682.
- 420 Gray, E. M., Rocca, K. A. C., Costantini, C., and Besansky, N. J. (2009). Inversion 2La is associated with  
421 enhanced desiccation resistance in *Anopheles gambiae*. *Malar. J.*, 8:215.
- 422 Hormozdiari, F., Alkan, C., Eichler, E. E., and Sahinalp, S. C. (2009). Combinatorial algorithms for  
423 structural variation detection in high-throughput sequenced genomes. *Genome Res.*, 19(7):1270–1278.
- 424 Hosmer Jr., D. W., Lemeshow, S., and Sturdivant, R. X. (2013). *Applied Logistic Regression*. Wiley, New  
425 York, NY, USA, 3 edition.
- 426 Huang, W., Massouras, A., Inoue, Y., Peiffer, J., Ràmia, M., Tarone, A. M., Turlapati, L., Zichner, T.,  
427 Zhu, D., Lyman, R. F., Magwire, M. M., Blankenburg, K., Carbone, M. A., Chang, K., Ellis, L. L.,  
428 Fernandez, S., Han, Y., Highnam, G., Hjelman, C. E., Jack, J. R., Javaid, M., Jayaseelan, J., Kalra,  
429 D., Lee, S., Lewis, L., Munidasa, M., Ongeri, F., Patel, S., Perales, L., Perez, A., Pu, L., Rollmann,  
430 S. M., Ruth, R., Saada, N., Warner, C., Williams, A., Wu, Y.-Q., Yamamoto, A., Zhang, Y., Zhu, Y.,  
431 Anholt, R. R. H., Korbelt, J. O., Mittelman, D., Muzny, D. M., Gibbs, R. A., Barbadilla, A., Johnston,  
432 J. S., Stone, E. A., Richards, S., Deplancke, B., and Mackay, T. F. C. (2014). Natural variation in  
433 genome architecture among 205 drosophila melanogaster genetic reference panel lines. *Genome Res.*,  
434 24(7):1193–1208.
- 435 Hunter, J. D. (2007). Matplotlib: A 2d graphics environment. *Computing In Science & Engineering*,  
436 9(3):90–95.
- 437 Lee, C., Abdool, A., and Huang, C.-H. (2009). PCA-based population structure inference with generic  
438 clustering algorithms. *BMC Bioinformatics*, 10 Suppl 1:S73.
- 439 Lobo, N. F., Sangaré, D. M., Regier, A. A., Reidenbach, K. R., Bretz, D. A., Sharakhova, M. V., Emrich,  
440 S. J., Traore, S. F., Costantini, C., Besansky, N. J., and Collins, F. H. (2010). Breakpoint structure of

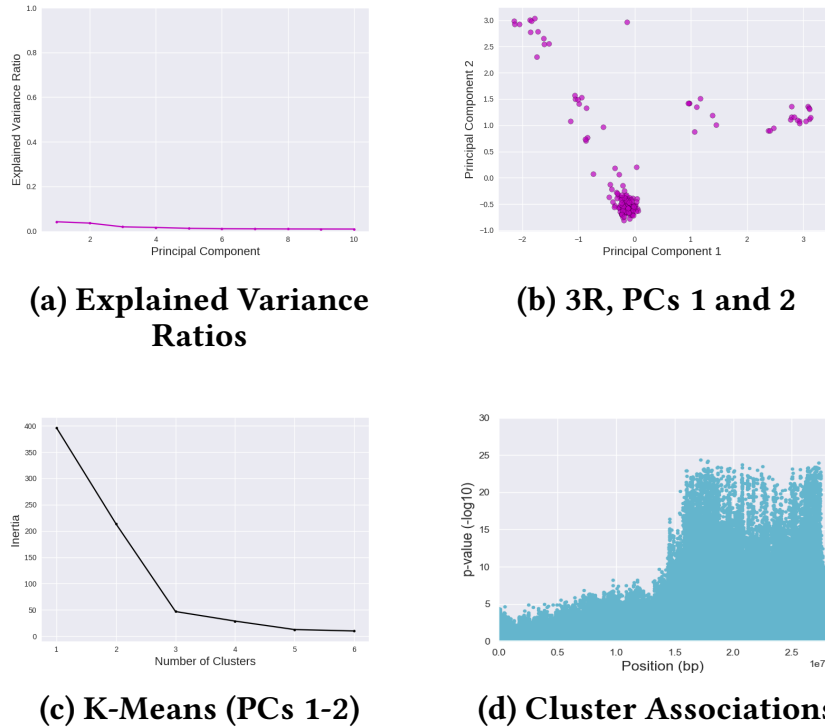

**Figure 4. Analysis of 3R Chromosome Arm SNPs of 198 *Drosophila* Samples with PCA, Clustering, and Cluster-SNP Association Tests** (a) Explained variance ratios, (b) PCA projection plot, (c) Inertia plot for K-Means clustering, and (d) Manhattan plots from Cluster-SNP association tests.

- 441 the *Anopheles gambiae* 2Rb chromosomal inversion. *Malar. J.*, 9:293.
- 442 Love, R. R., Steele, A. M., Coulibaly, M. B., Traore, S. F., Emrich, S. J., Fontaine, M. C., and Besan-
- 443 sky, N. J. (2016). Chromosomal inversions and ecotypic differentiation in *Anopheles gambiae*: the
- 444 perspective from whole-genome sequencing. *Mol. Ecol.*, 25(23):5889–5906.
- 445 Ma, J. and Amos, C. I. (2012). Investigation of inversion polymorphisms in the human genome using
- 446 principal components analysis. *PLoS One*, 7(7):e40224.
- 447 Ma, J., Xiong, M., You, M., Lozano, G., and Amos, C. I. (2014). Genome-wide association tests of
- 448 inversions with application to psoriasis. *Hum. Genet.*, 133(8):967–974.
- 449 Mackay, T. F. C., Richards, S., Stone, E. A., Barbadilla, A., Ayroles, J. F., Zhu, D., Casillas, S., Han,
- 450 Y., Magwire, M. M., Cridland, J. M., Richardson, M. F., Anholt, R. R. H., Barrón, M., Bess, C.,
- 451 Blankenburg, K. P., Carbone, M. A., Castellano, D., Chaboub, L., Duncan, L., Harris, Z., Javaid,
- 452 M., Jayaseelan, J. C., Jhangiani, S. N., Jordan, K. W., Lara, F., Lawrence, F., Lee, S. L., Librado, P.,
- 453 Linheiro, R. S., Lyman, R. F., Mackey, A. J., Munidasa, M., Muzny, D. M., Nazareth, L., Newsham,
- 454 I., Perales, L., Pu, L.-L., Qu, C., Ràmia, M., Reid, J. G., Rollmann, S. M., Rozas, J., Saada, N.,
- 455 Turlapati, L., Worley, K. C., Wu, Y.-Q., Yamamoto, A., Zhu, Y., Bergman, C. M., Thornton, K. R.,
- 456 Mittelman, D., and Gibbs, R. A. (2012). The *Drosophila melanogaster* Genetic Reference Panel. *Nature*,
- 457 482(7384):173–178.
- 458 Main, B. J., Lee, Y., Collier, T. C., Norris, L. C., Brisco, K., Fofana, A., Cornel, A. J., and Lanzaro, G. C.
- 459 (2015). Complex genome evolution in *Anopheles coluzzii* associated with increased insecticide usage
- 460 in mali. *Mol. Ecol.*, 24(20):5145–5157.
- 461 Miles, A., Harding, N. J., Botta, G., Clarkson, C., Antao, T., Kozak, K., Schridder, D., Kern, A., Redmond,
- 462 S., Sharakhov, I., et al. (2016). Natural diversity of the malaria vector *Anopheles gambiae*. *bioRxiv*.
- 463 Neafsey, D. E., Lawniczak, M. K. N., and Park, D. J. (2010). SNP genotyping defines complex gene-flow
- 464 boundaries among African malaria vector mosquitoes. *Science*, 2984.
- 465 Noor, M. A., Grams, K. L., Bertucci, L. A., and Reiland, J. (2001). Chromosomal inversions and the



- 466 reproductive isolation of species. *Proc. Natl. Acad. Sci. U. S. A.*, 98(21):12084–12088.
- 467 Nowling, R. J. and Emrich, S. J. (2018a). Adjusted likelihood-ratio test for variants with unknown  
468 genotypes. In *10th International Conference on Bioinformatics and Computational Biology (BiCOB)*.
- 469 Nowling, R. J. and Emrich, S. J. (2018b). Adjusted likelihood-ratio test for variants with unknown  
470 genotypes. *Journal of Bioinformatics and Computational Biology*, 16(5).
- 471 Nowling, R. J. and Emrich, S. J. (2018c). Detecting chromosomal inversions from dense snps by  
472 combining pca and association tests. In *Proceedings of the 2018 ACM International Conference on*  
473 *Bioinformatics, Computational Biology, and Health Informatics*, BCB '18, pages 270–276, New York,  
474 NY, USA. ACM.
- 475 O'Reilly, P. F., Coin, L. J. M., and Hoggart, C. J. (2010). invertFREGENE: software for simulating  
476 inversions in population genetic data. *Bioinformatics*, 26(6):838–840.
- 477 Patterson, N., Price, A. L., and Reich, D. (2006). Population structure and eigenanalysis. *PLoS Genet.*,  
478 2(12):e190.
- 479 Pedregosa, F., Varoquaux, G., Gramfort, A., Michel, V., Thirion, B., Grisel, O., Blondel, M., Prettenhofer,  
480 P., Weiss, R., Dubourg, V., et al. (2011). Scikit-learn: Machine learning in Python. *Journal of Machine*  
481 *Learning Research*, 12:2825–2830.
- 482 Prevosti, A., Ribo, G., Serra, L., Aguade, M., Balaña, J., Monclus, M., and Mestres, F. (1988). Coloniza-  
483 tion of america by drosophila subobscura: Experiment in natural populations that supports the adaptive  
484 role of chromosomal-inversion polymorphism. *Proc. Natl. Acad. Sci. U. S. A.*, 85(15):5597–5600.
- 485 Price, A. L., Patterson, N. J., Plenge, R. M., Weinblatt, M. E., Shadick, N. A., and Reich, D. (2006).  
486 Principal components analysis corrects for stratification in genome-wide association studies. *Nat.*  
487 *Genet.*, 38(8):904–909.
- 488 Riehle, M. M., Bukhari, T., Gneme, A., Guelbeogo, W. M., Coulibaly, B., Fofana, A., Pain, A., Bischoff,  
489 E., Renaud, F., Beavogui, A. H., Traore, S. F., Sagnon, N., and Vernick, K. D. (2017). The Anopheles  
490 gambiae 2La chromosome inversion is associated with susceptibility to plasmodium falciparum in  
491 africa. *Elife*, 6.
- 492 Rocca, K. A. C., Gray, E. M., Costantini, C., and Besansky, N. J. (2009). 2La chromosomal inversion  
493 enhances thermal tolerance of anopheles gambiae larvae. *Malar. J.*, 8:147.
- 494 Sharakhov, I. V., White, B. J., Sharakhova, M. V., Kayondo, J., Lobo, N. F., Santolamazza, F., Della Torre,  
495 A., Simard, F., Collins, F. H., and Besansky, N. J. (2006). Breakpoint structure reveals the unique origin  
496 of an interspecific chromosomal inversion (2la) in the anopheles gambiae complex. *Proc. Natl. Acad.*  
497 *Sci. U. S. A.*, 103(16):6258–6262.
- 498 Sindi, S. S. and Raphael, B. J. (2010). Identification and frequency estimation of inversion polymorphisms  
499 from haplotype data. *J. Comput. Biol.*, 17(3):517–531.
- 500 Suzuki, T., Tsurusaki, Y., Nakashima, M., Miyake, N., Saitsu, H., Takeda, S., and Matsumoto, N. (2014).  
501 Precise detection of chromosomal translocation or inversion breakpoints by whole-genome sequencing.  
502 *J. Hum. Genet.*, 59(12):649–654.
- 503 Walt, S. v. d., Colbert, S. C., and Varoquaux, G. (2011). The numpy array: A structure for efficient  
504 numerical computation. *Computing in Science & Engineering*, 13(2):22–30.
- 505 Zhu, S., Emrich, S. J., and Chen, D. Z. (2017). Inversion detection using PacBio long reads. In *2017*  
506 *IEEE International Conference on Bioinformatics and Biomedicine (BIBM)*, pages 237–242.
- 507 Zhu, S., Emrich, S. J., and Chen, D. Z. (2018). Predicting local inversions using rectangle clustering and  
508 representative rectangle prediction. In *2018 IEEE International Conference on Bioinformatics and*  
509 *Biomedicine (BIBM)*, pages 254–259.

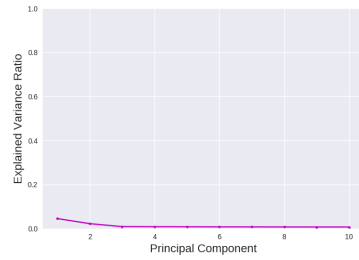

(a) Explained Variance Ratios

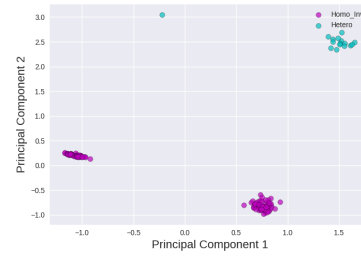

(b) 2L, PCs 1 and 2

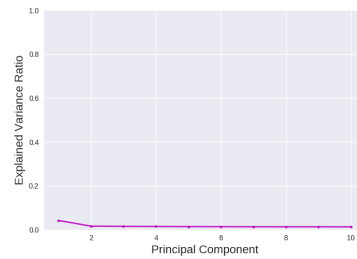

(c) Explained Variance Ratios (*An. gambiae*)

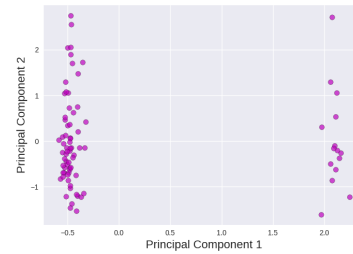

(d) 2L, PCs 1 and 2 (*An. gambiae*)

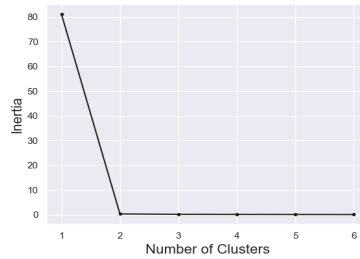

(e) K-Means (PC 1) (*An. gambiae*)

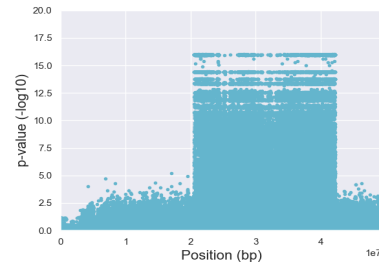

(f) Cluster Associations (*An. gambiae*)

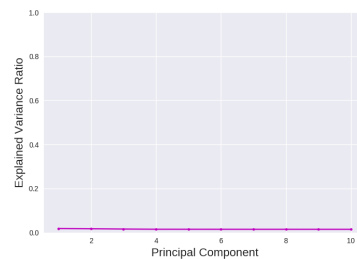

(g) Explained Variance Ratios (*An. coluzzii*)

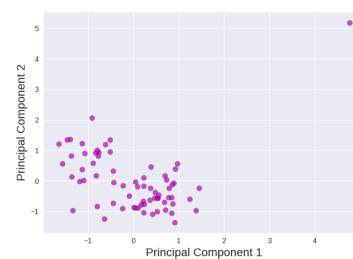

(h) 2L, PCs 1 and 2 (*An. coluzzii*)

**Figure 5. Analysis of 2L Chromosome Arm of 150 Burkina Faso *Anopheles* Samples with PCA, Clustering, and Cluster-SNP Association Tests** The samples clustered by species and karyotype, so samples were divided and re-analyzed by species. (a) Explained variance ratios for all samples, (b) PCA projection plot for all samples, (c) explained variance ratios for *An. gambiae* samples, (d) PCA projection plot for *An. gambiae* samples, (e) Inertia plot for K-Means clustering of *An. gambiae* samples, (f) Manhattan plots from Cluster-SNP association tests for *An. gambiae* samples, (g) explained variance ratios for *An. coluzzii* samples, and (h) PCA projection plot for *An. coluzzii* samples.

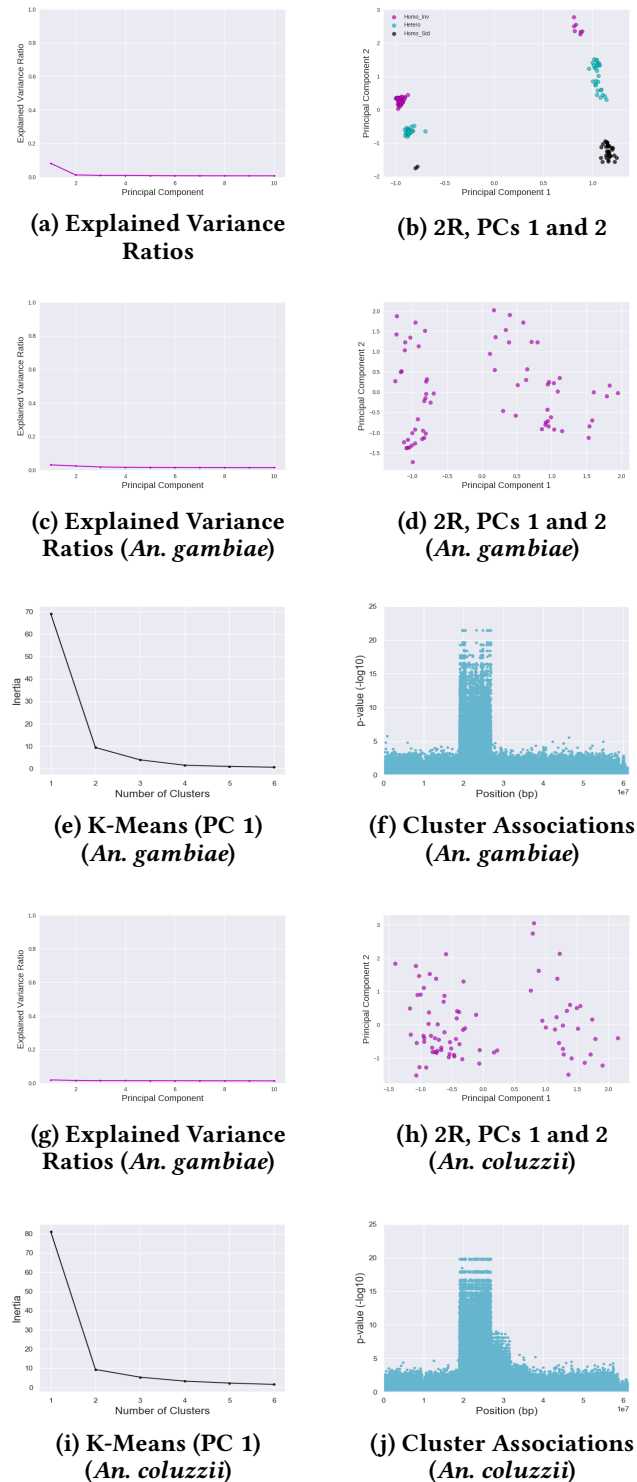

**Figure 6. Analysis of 2R Chromosome Arm of 150 Burkina Faso *Anopheles* Samples with PCA, Clustering, and Cluster-SNP Association Tests** The samples clustered by species and karyotype, so samples were divided and re-analyzed by species. (a) Explained variance ratios for all samples, (b) PCA projection plot for all samples, (c) explained variance ratios for *An. gambiae* samples, (d) PCA projection plot for *An. gambiae* samples, (e) Inertia plot for K-Means clustering of *An. gambiae* samples, (f) Manhattan plots from Cluster-SNP association tests for *An. gambiae* samples, (g) explained variance ratios for *An. coluzzii* samples, (h) PCA projection plot for *An. coluzzii* samples, (i) Inertia plot for K-Means clustering of *An. coluzzii* samples, and (j) Manhattan plots from Cluster-SNP association tests for *An. coluzzii* samples.

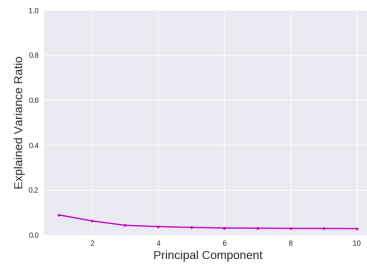

**(a) Explained Variance Ratios**

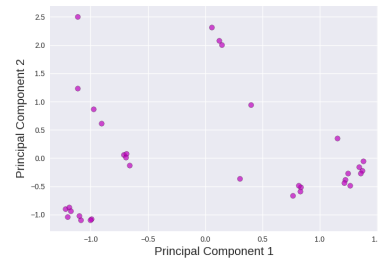

**(b) 2L, PCs 1 and 2**

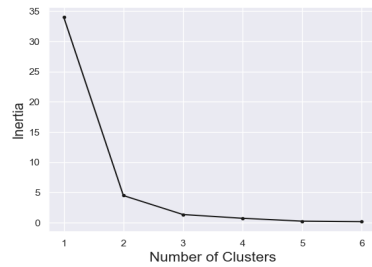

**(c) K-Means (PC 1)**

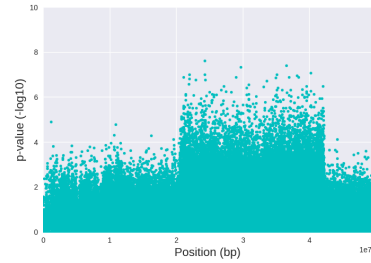

**(d) Cluster Associations**

**Figure 7. Analysis of 2L Chromosome Arm of 34 *Anopheles* Samples with PCA, Clustering, and Cluster-SNP Association Tests** (a) Explained variance ratios, (b) PCA projection plot, (c) Inertia plot for K-Means clustering, and (d) Manhattan plots from Cluster-SNP association tests.

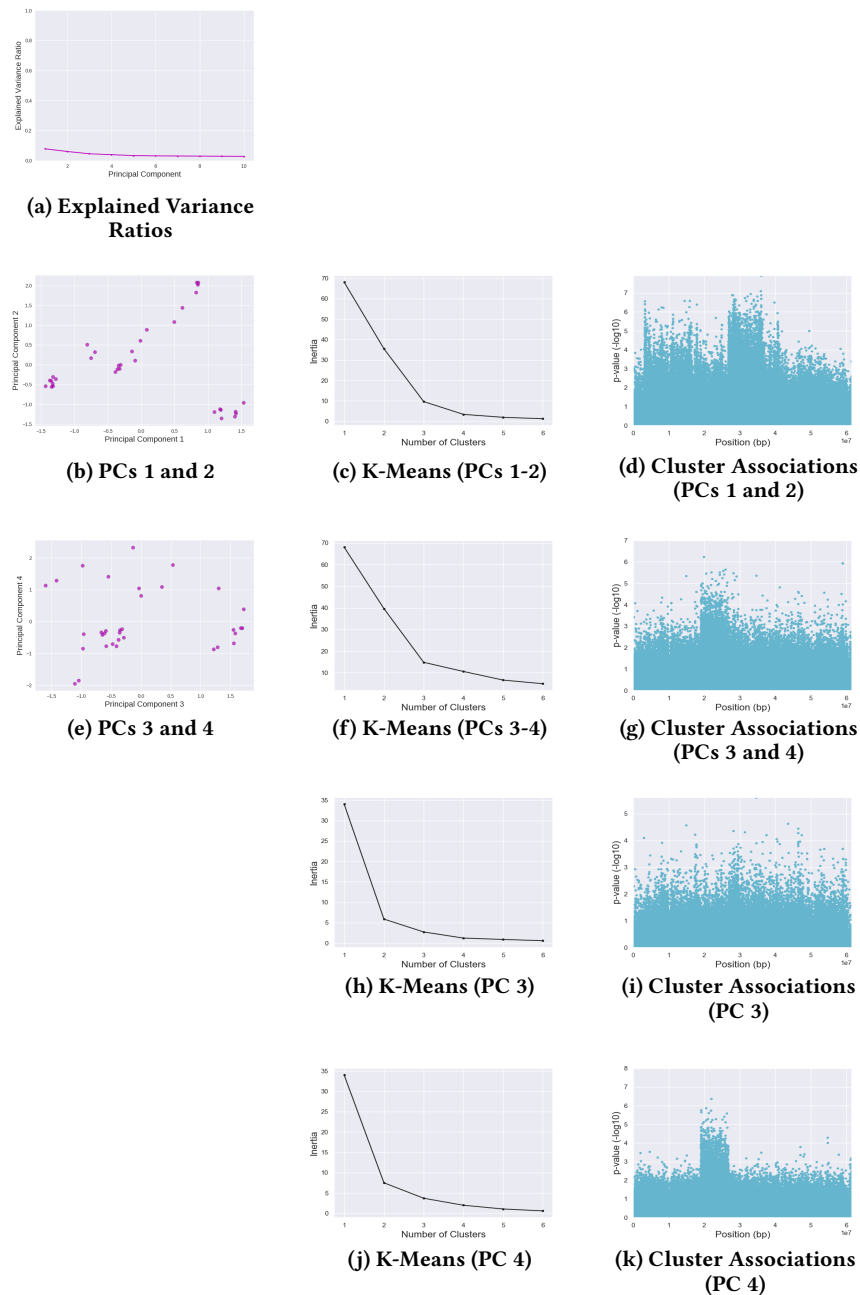

**Figure 8. Analysis of 2R Chromosome Arm of 34 *Anopheles* Samples with PCA, Clustering, and Cluster-SNP Association Tests** The explained variance analysis indicates that first 3-4 PCs were significant, so PCs 1 and 2 were analyzed followed by PCs 3 and 4. (a) Explained variance ratios, (b) PCA projection plot for PCs 1-2, (c) Inertia plot for K-Means clustering (PCs 1-2), (d) Manhattan plots from Cluster-SNP association tests for PCs 1-2, (e) PCA projection plot for PC 3 and 4, (f) Inertia plot for K-Means clustering (PCs 3-4), (g) Manhattan plots from Cluster-SNP association tests for PCs 3-4, (h) Inertia plot for K-Means clustering (PC 3), (i) Manhattan plots from Cluster-SNP association tests for PC 3, (j) Inertia plot for K-Means clustering (PC 4), and (k) Manhattan plots from Cluster-SNP association tests for PC 4.



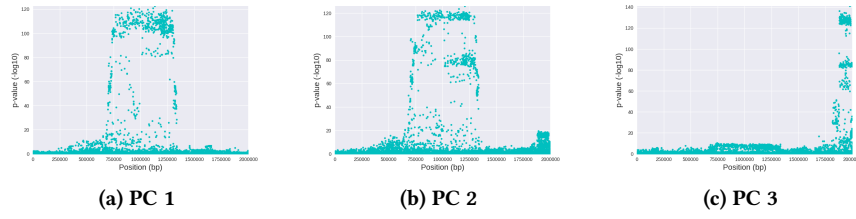

**Figure 9. Manhattan Plots from PC-SNP Associations for invertFREGENE Samples**

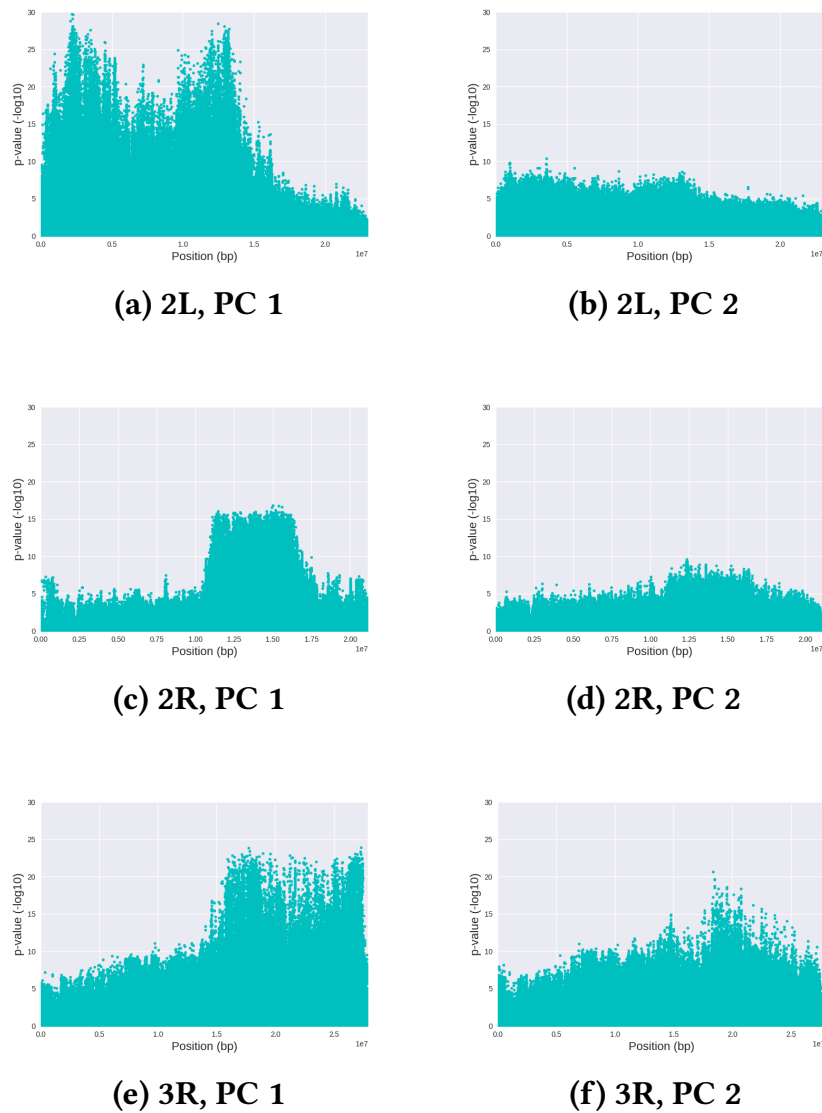

**Figure 10. Manhattan Plots from PC-SNP Associations for 198 *Drosophila* Samples**

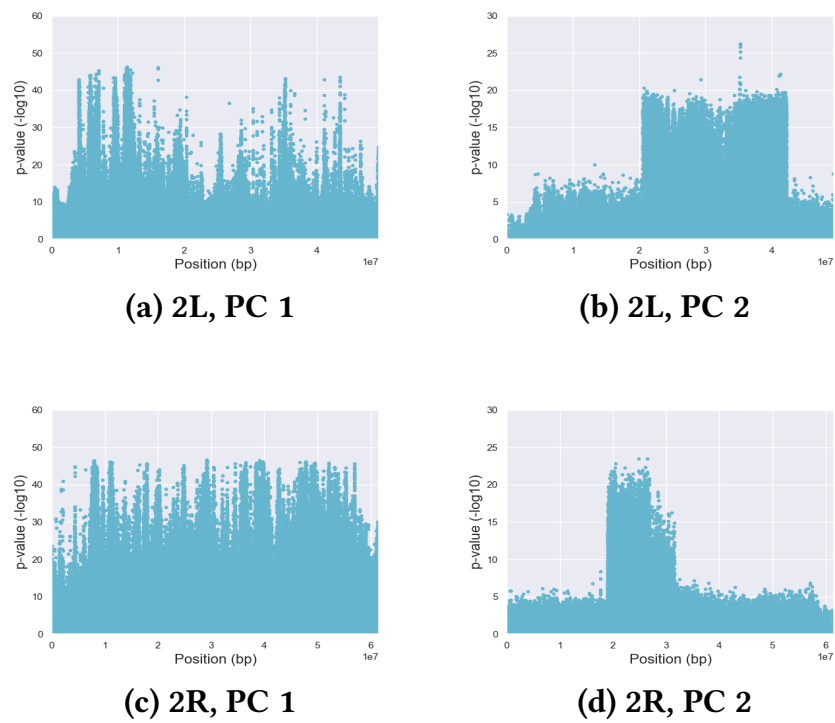

**Figure 11. Manhattan Plots from PC-SNP Associations for 150 Burkina Faso *Anopheles* Samples**

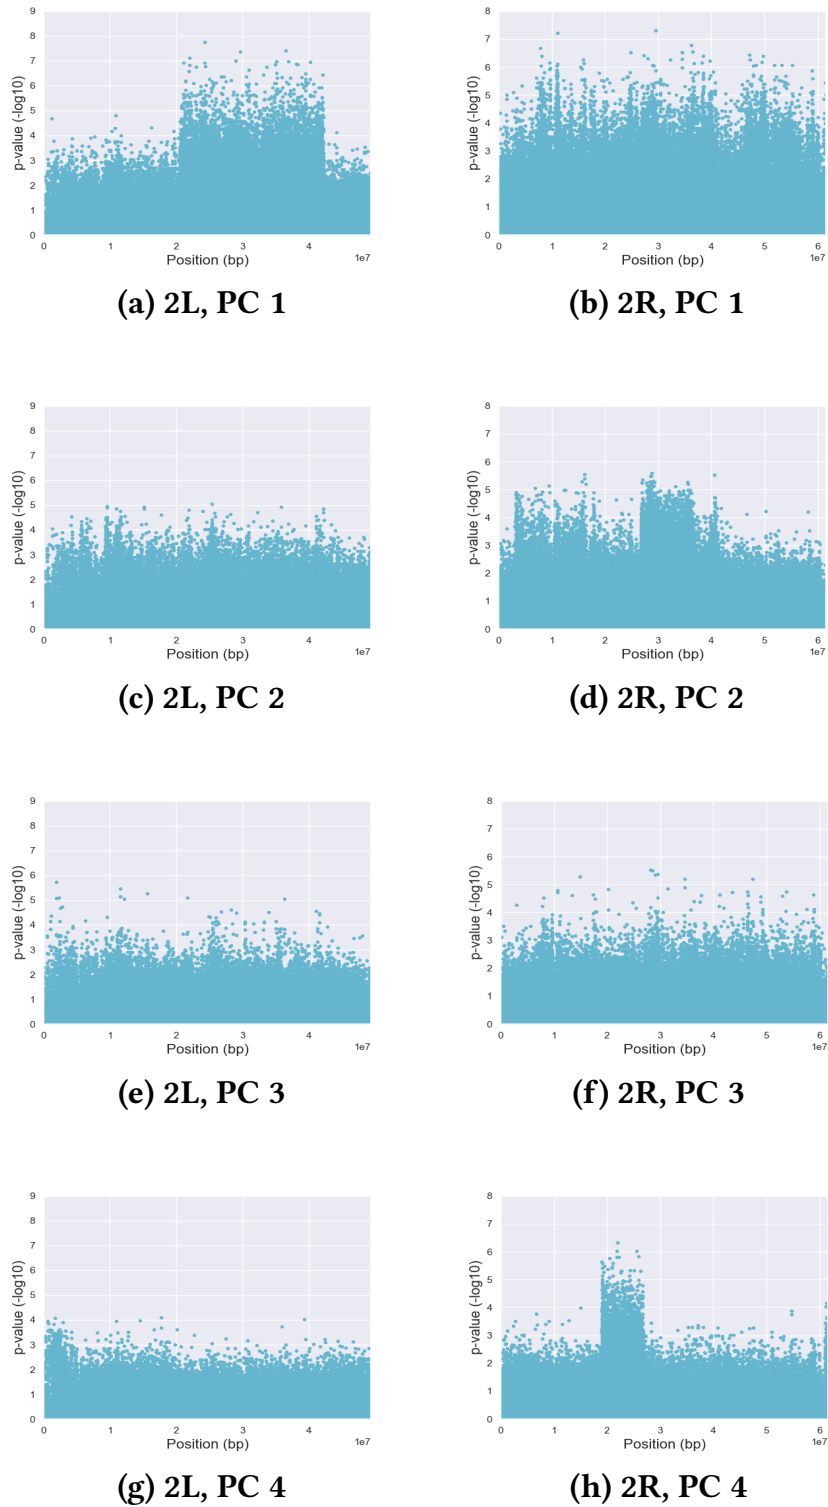

**Figure 12. Manhattan Plots from PC-SNP Associations for 34 *Anopheles* Samples**
